# Supplementary material for: Synthesis, cytotoxic and hydrolytic studies of titanium complexes anchored by a tripodal diamine bis(phenolate) ligand
Source: Royal Society of Chemistry journal article supplement (doi:10.1039/c4dt00975d), 2014-01-01
Supplement: c4dt00975d1.pdf [file c4dt00975d1.pdf]

## Electronic Supplementary Information

### Synthesis, Cytotoxic and Hydrolytic Studies of Titanium Complexes Anchored by a Tripodal Diamine Bis(phenolate) Ligand

Sónia Barroso,\* Ana Coelho, Santiago Gómez-Ruiz,\* Maria José Calhorda, Željko Žižak, Goran N. Kaluđerović, and Ana M. Martins

#### Growth inhibition curves:

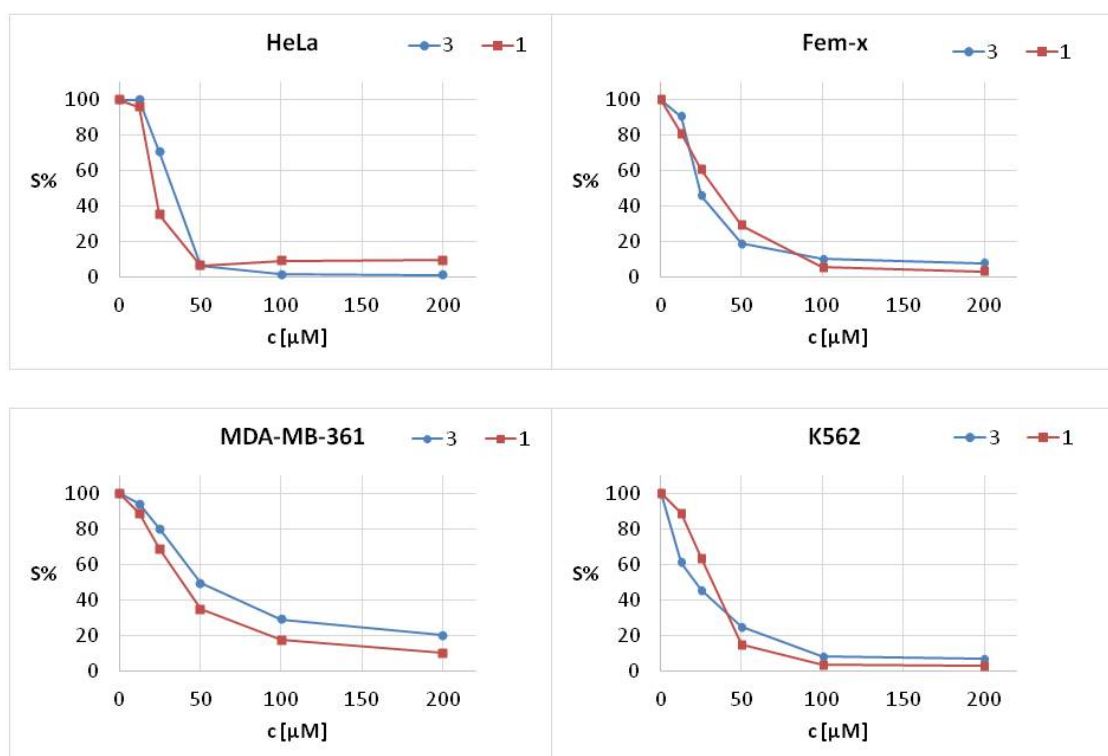

**Figure S1.** Growth inhibition curves of compounds 1 and 3 in HeLa, Fem-x, MDA-MB-361 and K562 cells

### ESI-MS data for compounds 3, 4 and 5:

The mass spectrum of **3** shows four major peaks that are tentatively assigned to the following species:

$m/z = 524.5$  (free ligand,  $\text{H}_2(\text{tBu}_2\text{O}_2\text{NN}')$ )

$m/z = 587.5$  ( $[\text{Ti}(\text{tBu}_2\text{O}_2\text{NN}')(\text{OH})]^+$ )

$m/z = 601.8$  ( $\text{H}_2(\text{tBu}_2\text{O}_2\text{NN}') + \text{HO}^i\text{Pr} + \text{H}_2\text{O}$ )

$m/z = 629.5$  ( $[\text{Ti}(\text{tBu}_2\text{O}_2\text{NN}')(\text{O}^i\text{Pr})]^+$ )

$m/z = 1215.8$  ( $[(\text{Ti}(\text{tBu}_2\text{O}_2\text{NN}')(\text{O}^i\text{Pr}))-\mu\text{-O}-(\text{Ti}(\text{tBu}_2\text{O}_2\text{NN}'))]^+$ )

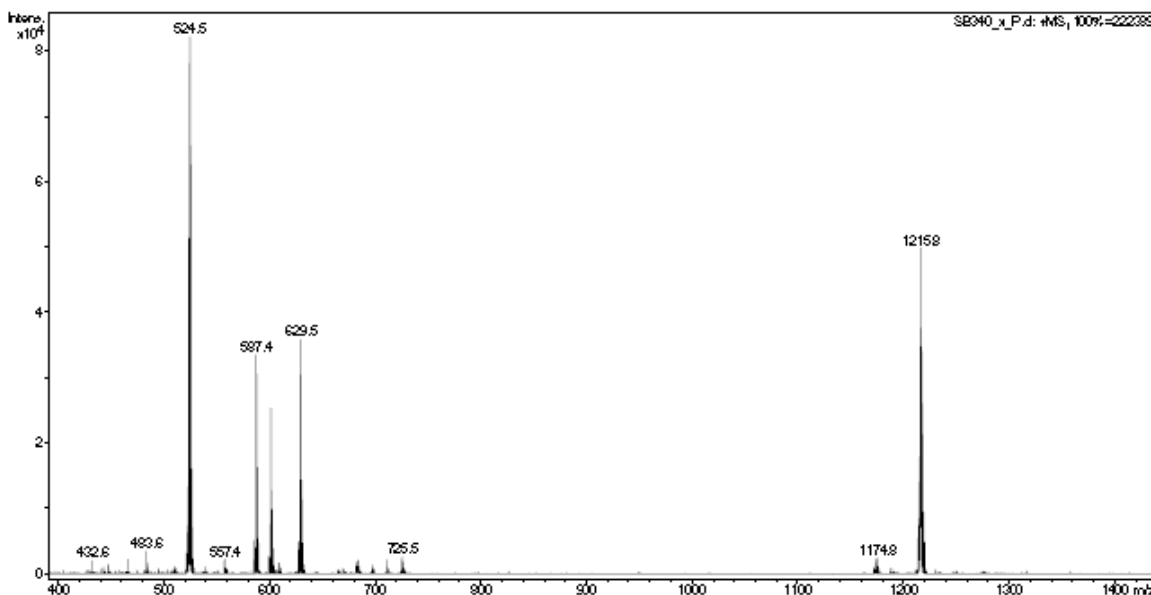

**Figure S2.** ESI-MS of **3** in  $\text{CH}_3\text{CN}$ .

The mass spectrum of **4** shows one major peak that was assigned to the following species:

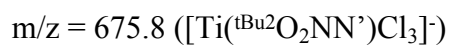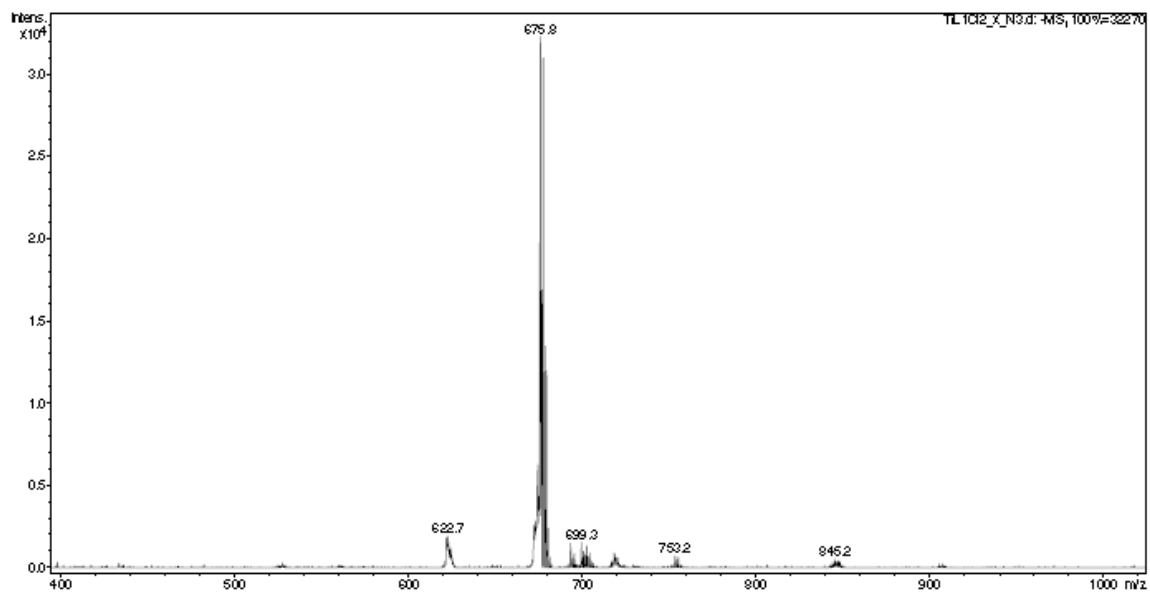

**Figure S3.** ESI-MS of **4** in THF.

The mass spectrum of **5** shows one major peak that was assigned to the following species:

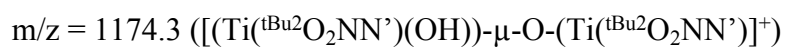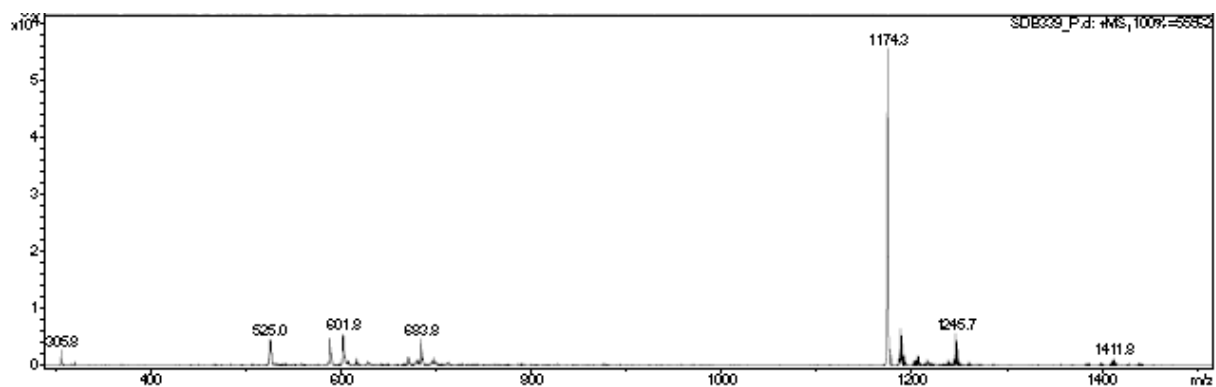

**Figure S4.** ESI-MS of **5** in CH<sub>2</sub>Cl<sub>2</sub>/CH<sub>3</sub>CN.

#### X-ray data for compound 4:

The molecular structure of **4** is depicted in Figure S1. The compound crystallizes in the monoclinic system, space group  $P2_1/a$ . The titanium coordination geometry is distorted octahedral, with the two phenolate moieties *trans*-coordinated, with an angle of  $159.0(2)^\circ$  between the planes containing the phenolate rings. The titanium atom is slightly away from the equatorial mean square plane ( $0.198(1)^\circ$ ). The sidearm fragment is coordinated to the metal and the tripodal ligand forces the two chloride ligands to adopt mutually *cis* dispositions. The Ti-Cl distances compare well with the values reported for other titanium(IV) systems supported by O- and N-based ligands.<sup>1</sup>

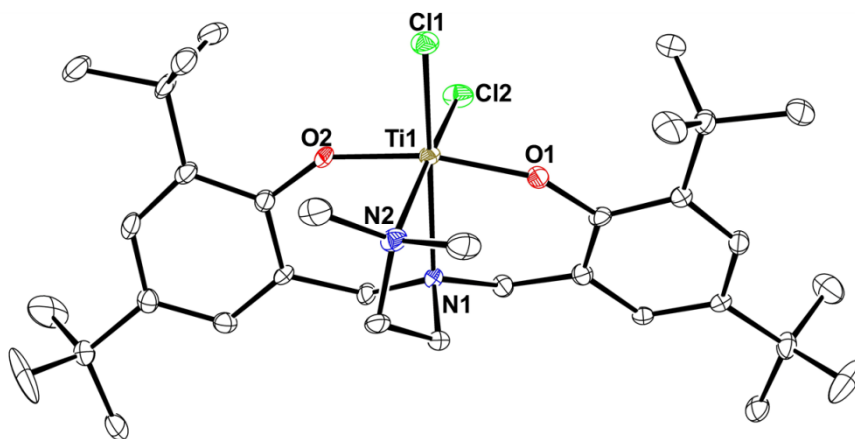

**Figure S1.** ORTEP diagram of **4** using 30 % probability level ellipsoids. Hydrogen atoms and disordered carbon atoms are omitted for clarity.

<sup>1</sup> a) G. J. Clarkson, V. C. Gibson, P. K. Y. Goh, M. L. Hammond, P. D. Knight, P. Scott, T. M. Smit, A. J. P. White, Williams, D. J. *Dalton Trans.* 2006, 5484-5491; b) K. J. Blackmore, N. Lal, J. W. Ziller, A. F. Heyduk, *Eur. J. Inorg. Chem.* 2009, 735-743; c) J. Saito, M. Mitani, S. Matsui, Y. Tohi, H. Makio, T. Nakano, H. Tanaka, N. Kashiwa, T. Fujita, *Macromol. Chem. Phys.* 2002, 203, 59-65.

**Table S1.** Selected structural parameters for **4**.

| <i>Distances (Å)</i>       |          |             |          |
|----------------------------|----------|-------------|----------|
| Ti1-O1                     | 1.839(2) | Ti1-N1      | 2.272(3) |
| Ti1-O2                     | 1.829(2) | Ti1-N2      | 2.307(3) |
| Ti1-Cl2                    | 2.307(1) | Ti1-Cl1     | 2.303(1) |
| Ti1-eq. plane <sup>a</sup> | 0.198(1) |             |          |
| <i>Angles (°)</i>          |          |             |          |
| O1-Ti1-O2                  | 166.6(1) | O2-Ti1-Cl1  | 97.5(1)  |
| O1-Ti1-Cl2                 | 89.8(1)  | N1-Ti1-Cl2  | 93.1(1)  |
| O1-Ti1-N1                  | 81.4(1)  | N2-Ti1-Cl2  | 170.7(1) |
| O1-Ti1-N2                  | 91.3(1)  | N2-Ti1-Cl1  | 87.8(1)  |
| O1-Ti1-Cl1                 | 95.6(1)  | N1-Ti1-N2   | 77.9(1)  |
| O2-Ti1-Cl2                 | 90.1(1)  | N1-Ti1-Cl1  | 165.3(1) |
| O2-Ti1-N1                  | 85.3(1)  | Cl2-Ti1-Cl1 | 101.4(1) |
| O2-Ti1-N2                  | 86.7(1)  | $\theta^b$  | 159.0(2) |

<sup>a</sup> The equatorial plane is defined by atoms O1, O2, N2 and Cl2.

<sup>b</sup>  $\theta$  is the dihedral angle between the planes containing the phenolate rings.

## Atom coordinates for the optimized molecules:

1\*

|    |              |              |              |    |              |              |              |
|----|--------------|--------------|--------------|----|--------------|--------------|--------------|
| 8  | 5.120048000  | 6.861504000  | 0.352839000  | 6  | 4.158588000  | 5.532259000  | -5.590886000 |
| 8  | 3.753023000  | 7.281990000  | 2.659616000  | 6  | 8.348233000  | 11.824263000 | 0.985588000  |
| 8  | 3.046427000  | 5.301036000  | -0.345238000 | 1  | 9.043346000  | 12.355909000 | 1.633491000  |
| 7  | 1.397690000  | 5.655163000  | 1.961953000  | 6  | 4.746717000  | 6.784795000  | -3.588170000 |
| 7  | 4.135672000  | 4.619054000  | 2.146543000  | 6  | 7.555415000  | 12.555633000 | 0.096840000  |
| 6  | 5.496028000  | 5.708718000  | 5.423207000  | 6  | 6.856753000  | 8.791068000  | -3.162269000 |
| 1  | 6.061068000  | 4.799912000  | 5.624077000  | 1  | 6.680564000  | 8.079690000  | -3.974154000 |
| 6  | 1.671113000  | 4.252453000  | 2.318902000  | 1  | 6.687815000  | 9.797316000  | -3.572045000 |
| 1  | 1.615969000  | 3.656239000  | 1.406925000  | 6  | 7.380461000  | 9.753315000  | 0.249920000  |
| 1  | 0.895209000  | 3.872506000  | 3.004230000  | 6  | 5.463209000  | 9.730161000  | -1.357726000 |
| 6  | 3.639265000  | 1.731607000  | -0.139897000 | 1  | 4.979943000  | 10.420248000 | -2.065968000 |
| 1  | 4.194571000  | 1.030436000  | 0.481233000  | 1  | 4.691892000  | 9.409967000  | -0.646493000 |
| 6  | 2.256356000  | 3.558805000  | -1.752349000 | 6  | 5.477512000  | 4.470334000  | -3.821566000 |
| 6  | 3.722495000  | 3.093805000  | 0.140719000  | 6  | 4.601167000  | 8.005006000  | -2.732800000 |
| 6  | 4.261495000  | 7.084816000  | 3.872242000  | 1  | 3.901424000  | 7.808925000  | -1.914125000 |
| 6  | 4.577111000  | 7.795014000  | 6.145344000  | 1  | 4.168919000  | 8.817486000  | -3.336363000 |
| 1  | 4.416642000  | 8.535146000  | 6.927695000  | 6  | 8.731440000  | 6.326723000  | -3.075895000 |
| 6  | 5.302978000  | 6.636876000  | 6.444115000  | 1  | 8.866979000  | 5.365501000  | -2.576252000 |
| 6  | 2.207972000  | 2.188038000  | -1.999242000 | 1  | 7.850903000  | 6.254410000  | -3.714756000 |
| 1  | 1.623859000  | 1.838035000  | -2.848963000 | 1  | 9.612560000  | 6.536863000  | -3.701793000 |
| 6  | 4.995993000  | 5.921826000  | 4.138553000  | 6  | 9.812902000  | 7.472794000  | -1.294721000 |
| 6  | 2.877742000  | 1.252383000  | -1.206298000 | 1  | 9.683588000  | 8.189353000  | -0.483543000 |
| 6  | 3.029527000  | 4.081992000  | 2.969083000  | 1  | 10.053558000 | 6.501555000  | -0.861414000 |
| 1  | 3.053934000  | 4.605798000  | 3.928685000  | 1  | 10.639029000 | 7.798134000  | -1.945634000 |
| 1  | 3.202613000  | 3.016549000  | 3.180426000  | 22 | 6.642744000  | 6.933511000  | -0.602235000 |
| 6  | 3.010618000  | 4.007714000  | -0.651938000 | 17 | 7.968378000  | 5.361134000  | 0.469527000  |
| 6  | 4.663246000  | 3.609021000  | 1.187554000  | 6  | 2.765177000  | -0.220846000 | -1.484890000 |
| 1  | 5.053748000  | 2.759179000  | 1.767653000  | 1  | 2.754766000  | -0.424864000 | -2.560095000 |
| 1  | 5.521366000  | 4.082104000  | 0.696593000  | 1  | 3.600490000  | -0.774960000 | -1.047146000 |
| 6  | 4.048224000  | 8.042807000  | 4.882625000  | 1  | 1.841021000  | -0.640297000 | -1.068350000 |
| 6  | 5.295330000  | 4.968051000  | 3.022803000  | 6  | 3.486594000  | 5.445916000  | -6.933193000 |
| 1  | 6.065527000  | 5.382640000  | 2.363681000  | 1  | 4.201157000  | 5.197269000  | -7.726038000 |
| 1  | 5.702408000  | 4.037735000  | 3.446698000  | 1  | 2.712149000  | 4.670685000  | -6.944997000 |
| 6  | 0.995571000  | 6.427562000  | 3.143717000  | 1  | 3.010348000  | 6.393020000  | -7.200878000 |
| 1  | 0.868396000  | 7.473204000  | 2.856866000  | 6  | 7.685208000  | 14.049938000 | -0.006763000 |
| 1  | 1.759468000  | 6.379490000  | 3.919910000  | 1  | 7.899151000  | 14.500556000 | 0.967217000  |
| 1  | 0.046494000  | 6.044271000  | 3.549436000  | 1  | 8.500572000  | 14.337935000 | -0.681944000 |
| 6  | 0.288373000  | 5.684597000  | 0.998681000  | 1  | 6.768018000  | 14.504933000 | -0.391731000 |
| 1  | 0.575333000  | 5.149444000  | 0.093258000  | 6  | 5.872418000  | 6.417295000  | 7.818214000  |
| 1  | 0.065283000  | 6.719494000  | 0.735987000  | 1  | 5.135021000  | 6.632767000  | 8.598559000  |
| 1  | -0.609913000 | 5.215079000  | 1.428340000  | 1  | 6.207729000  | 5.384839000  | 7.950268000  |
| 22 | 3.475188000  | 6.510808000  | 1.002555000  | 1  | 6.735322000  | 7.068382000  | 8.002247000  |
| 17 | 2.232982000  | 8.285145000  | 0.173422000  | 6  | 1.578057000  | 4.548976000  | -2.651345000 |
| 8  | 6.077183000  | 5.759598000  | -1.925123000 | 1  | 2.308394000  | 5.026957000  | -3.314860000 |
| 8  | 7.317968000  | 8.425517000  | 0.275707000  | 1  | 0.823231000  | 4.061209000  | -3.274063000 |
| 7  | 8.561899000  | 7.370239000  | -2.058335000 | 1  | 1.102363000  | 5.353225000  | -2.083068000 |
| 7  | 5.861043000  | 8.503743000  | -2.105643000 | 6  | 6.164291000  | 3.271622000  | -3.240948000 |
| 6  | 4.127447000  | 6.703192000  | -4.836177000 | 1  | 5.606169000  | 2.887952000  | -2.379096000 |
| 1  | 3.596724000  | 7.573919000  | -5.217930000 | 1  | 6.245283000  | 2.469236000  | -3.978784000 |
| 6  | 8.288169000  | 8.676663000  | -2.679017000 | 1  | 7.166125000  | 3.520433000  | -2.878309000 |
| 1  | 8.496389000  | 9.450432000  | -1.938702000 | 6  | 9.115610000  | 9.669457000  | 2.069584000  |
| 1  | 8.968452000  | 8.847522000  | -3.530096000 | 1  | 8.484858000  | 9.036959000  | 2.702453000  |
| 6  | 6.649630000  | 11.851127000 | -0.696136000 | 1  | 9.824449000  | 8.995959000  | 1.575099000  |
| 1  | 5.994875000  | 12.394735000 | -1.375563000 | 1  | 9.684643000  | 10.347613000 | 2.710618000  |
| 6  | 8.284316000  | 10.436179000 | 1.084382000  | 6  | 3.286004000  | 9.293375000  | 4.563887000  |
| 6  | 6.543029000  | 10.464160000 | -0.622638000 | 1  | 3.750410000  | 9.832240000  | 3.731635000  |
| 6  | 5.442169000  | 5.674516000  | -3.089654000 | 1  | 2.261350000  | 9.069593000  | 4.248494000  |
| 6  | 4.834393000  | 4.430080000  | -5.054834000 | 1  | 3.242187000  | 9.958413000  | 5.430112000  |
| 1  | 4.862412000  | 3.500342000  | -5.620933000 |    |              |              |              |

3\*

|   |              |              |              |    |              |              |              |
|---|--------------|--------------|--------------|----|--------------|--------------|--------------|
| 8 | 5.167644000  | 6.724086000  | 0.274238000  | 1  | 10.809016000 | 7.956680000  | -1.487474000 |
| 8 | 6.424097000  | 5.629232000  | -1.897376000 | 22 | 6.815612000  | 6.832945000  | -0.490869000 |
| 8 | 7.274388000  | 8.380073000  | 0.491254000  | 6  | 4.063237000  | 5.295363000  | -7.028268000 |
| 7 | 8.761628000  | 7.481349000  | -1.814000000 | 1  | 4.798514000  | 5.011045000  | -7.788995000 |
| 7 | 6.018547000  | 8.406476000  | -2.076930000 | 1  | 3.268824000  | 4.540158000  | -7.052115000 |
| 6 | 4.530394000  | 6.528376000  | -4.871616000 | 1  | 3.620266000  | 6.247501000  | -7.333353000 |
| 1 | 3.945852000  | 7.367043000  | -5.247361000 | 6  | 7.509419000  | 14.010909000 | 0.073017000  |
| 6 | 8.448692000  | 8.746032000  | -2.496228000 | 1  | 7.435775000  | 14.504249000 | 1.047819000  |
| 1 | 8.546016000  | 9.553075000  | -1.768411000 | 1  | 8.464819000  | 14.316956000 | -0.370278000 |
| 1 | 9.174921000  | 8.942894000  | -3.302505000 | 1  | 6.712289000  | 14.407762000 | -0.561984000 |
| 6 | 6.594576000  | 11.765426000 | -0.640042000 | 6  | 6.818331000  | 3.238562000  | -3.336471000 |
| 1 | 5.989153000  | 12.273027000 | -1.389861000 | 1  | 6.409612000  | 2.899109000  | -2.378878000 |
| 6 | 8.105841000  | 10.443058000 | 1.305237000  | 1  | 6.812764000  | 2.396008000  | -4.032862000 |
| 6 | 6.515198000  | 10.377013000 | -0.538603000 | 1  | 7.861245000  | 3.518144000  | -3.148910000 |
| 6 | 5.855593000  | 5.552005000  | -3.094171000 | 6  | 8.870105000  | 9.723756000  | 2.376787000  |
| 6 | 5.440444000  | 4.339775000  | -5.139137000 | 1  | 8.196265000  | 9.130055000  | 3.003655000  |
| 1 | 5.576016000  | 3.439030000  | -5.736114000 | 1  | 9.595303000  | 9.016825000  | 1.959505000  |
| 6 | 4.687940000  | 5.395002000  | -5.664363000 | 1  | 9.408154000  | 10.428845000 | 3.015637000  |
| 6 | 8.146520000  | 11.828323000 | 1.173994000  | 8  | 7.873711000  | 5.656546000  | 0.385465000  |
| 1 | 8.775033000  | 12.394100000 | 1.860234000  | 6  | 8.035255000  | 4.257297000  | 0.367637000  |
| 6 | 5.090306000  | 6.617852000  | -3.596450000 | 6  | 6.965351000  | 3.594006000  | 1.222307000  |
| 6 | 7.412499000  | 12.516034000 | 0.202506000  | 1  | 7.065241000  | 3.905158000  | 2.267408000  |
| 6 | 7.046320000  | 8.745246000  | -3.079001000 | 1  | 5.971285000  | 3.882583000  | 0.871129000  |
| 1 | 6.974353000  | 8.006357000  | -3.882160000 | 1  | 7.052621000  | 2.503233000  | 1.175864000  |
| 1 | 6.838754000  | 9.728493000  | -3.528034000 | 6  | 9.439541000  | 3.908628000  | 0.840519000  |
| 6 | 7.292778000  | 9.705400000  | 0.419677000  | 1  | 9.592893000  | 4.262782000  | 1.865123000  |
| 6 | 5.523650000  | 9.604346000  | -1.356411000 | 1  | 9.598476000  | 2.825400000  | 0.821123000  |
| 1 | 5.055654000  | 10.285772000 | -2.085559000 | 1  | 10.195781000 | 4.375103000  | 0.201310000  |
| 1 | 4.723401000  | 9.242669000  | -0.698308000 | 1  | 7.908785000  | 3.914949000  | -0.671328000 |
| 6 | 6.028195000  | 4.390798000  | -3.879405000 | 6  | 4.592883000  | 7.272623000  | 1.437337000  |
| 6 | 4.821485000  | 7.808515000  | -2.728162000 | 1  | 4.963163000  | 8.304307000  | 1.557219000  |
| 1 | 4.151873000  | 7.524181000  | -1.908473000 | 6  | 5.013244000  | 6.475176000  | 2.663327000  |
| 1 | 4.312789000  | 8.580940000  | -3.326902000 | 6  | 3.079674000  | 7.304902000  | 1.272072000  |
| 6 | 9.108307000  | 6.435302000  | -2.780600000 | 1  | 2.794298000  | 7.890369000  | 0.392106000  |
| 1 | 9.267626000  | 5.495946000  | -2.247420000 | 1  | 2.692799000  | 6.288901000  | 1.142793000  |
| 1 | 8.302138000  | 6.281050000  | -3.497842000 | 1  | 2.600406000  | 7.751051000  | 2.149696000  |
| 1 | 10.028531000 | 6.699299000  | -3.325486000 | 1  | 4.654793000  | 5.443416000  | 2.587294000  |
| 6 | 9.907981000  | 7.676698000  | -0.920029000 | 1  | 4.599749000  | 6.919570000  | 3.574918000  |
| 1 | 9.678440000  | 8.460613000  | -0.198935000 | 1  | 6.103153000  | 6.456021000  | 2.745674000  |
| 1 | 10.092475000 | 6.751350000  | -0.372369000 |    |              |              |              |

5\*

|   |             |             |              |    |              |             |              |
|---|-------------|-------------|--------------|----|--------------|-------------|--------------|
| 8 | 5.123041000 | 6.899432000 | 0.348968000  | 6  | 2.861374000  | 1.318098000 | -1.266763000 |
| 8 | 3.723531000 | 7.386769000 | 2.636050000  | 6  | 3.054475000  | 4.107422000 | 2.923299000  |
| 8 | 2.999149000 | 5.372748000 | -0.409086000 | 1  | 3.091057000  | 4.615086000 | 3.891779000  |
| 7 | 1.418966000 | 5.697768000 | 1.961277000  | 1  | 3.228211000  | 3.037752000 | 3.115370000  |
| 7 | 4.140464000 | 4.663975000 | 2.093553000  | 6  | 2.979967000  | 4.078919000 | -0.710545000 |
| 6 | 5.567971000 | 5.772830000 | 5.324227000  | 6  | 4.661939000  | 3.678526000 | 1.110856000  |
| 1 | 6.136790000 | 4.860485000 | 5.499033000  | 1  | 5.075363000  | 2.821581000 | 1.666352000  |
| 6 | 1.684401000 | 4.289363000 | 2.293048000  | 1  | 5.502128000  | 4.171724000 | 0.608365000  |
| 1 | 1.618388000 | 3.707685000 | 1.372446000  | 6  | 4.105642000  | 8.101420000 | 4.853968000  |
| 1 | 0.915782000 | 3.900008000 | 2.981592000  | 6  | 5.309127000  | 5.030058000 | 2.940254000  |
| 6 | 3.629165000 | 1.804138000 | -0.208738000 | 1  | 6.055641000  | 5.442872000 | 2.252192000  |
| 1 | 4.195345000 | 1.106908000 | 0.407308000  | 1  | 5.737562000  | 4.109448000 | 3.368158000  |
| 6 | 2.219057000 | 3.619732000 | -1.803971000 | 6  | 1.028155000  | 6.448774000 | 3.157282000  |
| 6 | 3.708066000 | 3.167229000 | 0.072577000  | 1  | 0.902059000  | 7.500725000 | 2.894164000  |
| 6 | 4.281888000 | 7.159090000 | 3.816675000  | 1  | 1.796777000  | 6.385611000 | 3.927524000  |
| 6 | 4.674039000 | 7.846795000 | 6.096759000  | 1  | 0.078480000  | 6.064908000 | 3.562155000  |
| 1 | 4.536268000 | 8.580012000 | 6.890202000  | 6  | 0.325743000  | 5.784483000 | 0.986379000  |
| 6 | 5.410144000 | 6.687219000 | 6.362148000  | 1  | 0.587273000  | 5.215558000 | 0.094536000  |
| 6 | 2.178049000 | 2.249713000 | -2.052950000 | 1  | 0.191370000  | 6.829014000 | 0.699240000  |
| 1 | 1.589426000 | 1.896869000 | -2.898499000 | 1  | -0.612588000 | 5.391853000 | 1.407968000  |
| 6 | 5.028379000 | 5.993210000 | 4.055362000  | 22 | 3.446565000  | 6.587144000 | 0.942491000  |

|   |             |              |              |    |              |              |              |
|---|-------------|--------------|--------------|----|--------------|--------------|--------------|
| 8 | 6.089933000 | 5.653543000  | -1.873829000 | 1  | 10.645961000 | 7.582179000  | -1.935343000 |
| 8 | 7.419946000 | 8.374048000  | 0.299999000  | 22 | 6.671521000  | 6.852280000  | -0.567732000 |
| 7 | 8.543479000 | 7.291076000  | -2.080357000 | 6  | 2.758707000  | -0.155729000 | -1.546370000 |
| 7 | 5.876653000 | 8.455218000  | -2.090169000 | 1  | 2.787363000  | -0.362440000 | -2.621009000 |
| 6 | 4.214855000 | 6.629016000  | -4.830011000 | 1  | 3.578228000  | -0.708507000 | -1.078044000 |
| 1 | 3.704660000 | 7.506630000  | -5.224453000 | 1  | 1.820380000  | -0.575541000 | -1.163085000 |
| 6 | 8.303793000 | 8.625906000  | -2.647832000 | 6  | 3.612027000  | 5.383886000  | -6.945837000 |
| 1 | 8.522108000 | 9.364160000  | -1.874724000 | 1  | 4.347438000  | 5.147684000  | -7.723577000 |
| 1 | 8.990474000 | 8.819269000  | -3.489350000 | 1  | 2.842041000  | 4.605118000  | -6.986283000 |
| 6 | 6.555963000 | 11.786144000 | -0.607288000 | 1  | 3.137986000  | 6.331653000  | -7.215662000 |
| 1 | 5.867843000 | 12.309021000 | -1.270507000 | 6  | 7.489976000  | 14.023306000 | 0.107087000  |
| 6 | 8.281841000 | 10.422850000 | 1.111796000  | 1  | 7.666231000  | 14.468629000 | 1.091346000  |
| 6 | 6.514069000 | 10.393088000 | -0.562067000 | 1  | 8.298699000  | 14.365585000 | -0.550668000 |
| 6 | 5.473686000 | 5.585803000  | -3.048330000 | 1  | 6.556022000  | 14.437268000 | -0.284197000 |
| 6 | 4.894681000 | 4.348482000  | -5.032103000 | 6  | 6.016731000  | 6.449600000  | 7.717321000  |
| 1 | 4.923371000 | 3.417298000  | -5.596010000 | 1  | 5.278808000  | 6.574105000  | 8.517383000  |
| 6 | 4.248939000 | 5.459458000  | -5.585836000 | 1  | 6.426847000  | 5.438941000  | 7.797553000  |
| 6 | 8.278045000 | 11.813076000 | 1.044175000  | 1  | 6.833006000  | 7.152632000  | 7.921834000  |
| 1 | 8.959771000 | 12.364215000 | 1.690398000  | 6  | 1.521250000  | 4.604908000  | -2.693484000 |
| 6 | 4.802107000 | 6.705332000  | -3.565278000 | 1  | 2.248609000  | 5.159963000  | -3.297053000 |
| 6 | 7.435406000 | 12.522685000 | 0.184409000  | 1  | 0.830778000  | 4.098260000  | -3.373167000 |
| 6 | 6.872330000 | 8.786713000  | -3.129272000 | 1  | 0.963496000  | 5.349268000  | -2.117276000 |
| 1 | 6.690690000 | 8.120087000  | -3.977630000 | 6  | 6.164941000  | 3.175020000  | -3.187819000 |
| 1 | 6.723029000 | 9.815165000  | -3.489335000 | 1  | 5.609149000  | 2.827516000  | -2.309526000 |
| 6 | 7.397563000 | 9.700014000  | 0.284003000  | 1  | 6.210779000  | 2.355656000  | -3.909948000 |
| 6 | 5.451111000 | 9.646352000  | -1.311803000 | 1  | 7.180427000  | 3.400026000  | -2.846719000 |
| 1 | 4.944510000 | 10.345828000 | -1.996301000 | 6  | 9.177196000  | 9.682646000  | 2.060611000  |
| 1 | 4.694533000 | 9.278366000  | -0.608287000 | 1  | 8.596493000  | 9.015753000  | 2.707052000  |
| 6 | 5.506600000 | 4.382174000  | -3.783441000 | 1  | 9.903494000  | 9.053297000  | 1.532740000  |
| 6 | 4.632950000 | 7.930648000  | -2.719154000 | 1  | 9.735253000  | 10.376852000 | 2.694326000  |
| 1 | 3.936010000 | 7.722502000  | -1.900110000 | 6  | 3.329240000  | 9.353819000  | 4.578057000  |
| 1 | 4.183280000 | 8.728393000  | -3.331684000 | 1  | 3.783092000  | 9.923354000  | 3.759430000  |
| 6 | 8.676301000 | 6.283217000  | -3.136287000 | 1  | 2.301860000  | 9.128391000  | 4.270860000  |
| 1 | 8.773847000 | 5.297649000  | -2.677292000 | 1  | 3.288468000  | 9.995637000  | 5.461978000  |
| 1 | 7.795455000 | 6.267127000  | -3.778086000 | 8  | 2.454633000  | 8.014350000  | 0.335392000  |
| 1 | 9.565441000 | 6.483957000  | -3.754653000 | 1  | 2.524410000  | 8.787288000  | 0.906876000  |
| 6 | 9.786970000 | 7.305354000  | -1.304306000 | 8  | 7.739744000  | 5.673720000  | 0.359383000  |
| 1 | 9.690863000 | 8.019498000  | -0.485889000 | 1  | 8.227560000  | 6.090906000  | 1.078378000  |
| 1 | 9.954009000 | 6.310717000  | -0.886391000 |    |              |              |              |

### HO<sup>1</sup>Pr

|   |              |              |              |
|---|--------------|--------------|--------------|
| 6 | -0.199582000 | 1.645863000  | -3.769580000 |
| 1 | -0.194533000 | 2.722534000  | -3.524950000 |
| 6 | 1.099138000  | 1.026990000  | -3.270732000 |
| 6 | -1.419533000 | 1.012998000  | -3.128596000 |
| 1 | -2.333265000 | 1.460647000  | -3.527992000 |
| 1 | -1.442148000 | -0.060035000 | -3.344083000 |
| 1 | -1.406796000 | 1.151487000  | -2.043586000 |
| 1 | 1.116773000  | -0.043383000 | -3.499752000 |
| 1 | 1.210772000  | 1.153989000  | -2.189110000 |
| 1 | 1.968832000  | 1.492511000  | -3.749279000 |
| 8 | -0.347237000 | 1.468672000  | -5.169328000 |
| 1 | 0.422033000  | 1.859800000  | -5.595565000 |

### H<sub>2</sub>O

|   |             |              |              |
|---|-------------|--------------|--------------|
| 8 | 4.479911000 | 0.000000000  | -0.886318000 |
| 1 | 4.479911000 | 0.756923000  | -0.294232000 |
| 1 | 4.479911000 | -0.756923000 | -0.294232000 |

### NET<sub>3</sub>·HCl

### Net<sub>3</sub>

|   |              |              |              |
|---|--------------|--------------|--------------|
| 7 | -0.255382000 | -0.663862000 | -0.117696000 |
| 6 | -1.515703000 | -1.007495000 | 0.526388000  |
| 1 | -1.477594000 | -0.870830000 | 1.624517000  |
| 1 | -2.273346000 | -0.304903000 | 0.159111000  |
| 6 | -1.979681000 | -2.422431000 | 0.206836000  |
| 1 | -1.306157000 | -3.183785000 | 0.611514000  |
| 1 | -2.038194000 | -2.564690000 | -0.875868000 |
| 1 | -2.969413000 | -2.604080000 | 0.637921000  |
| 6 | 0.883978000  | -1.290403000 | 0.535730000  |
| 1 | 1.034422000  | -0.913673000 | 1.566773000  |
| 1 | 0.653935000  | -2.356006000 | 0.639125000  |
| 6 | 2.180636000  | -1.159014000 | -0.248733000 |
| 1 | 2.554882000  | -0.130937000 | -0.268326000 |
| 1 | 2.035203000  | -1.488930000 | -1.281789000 |
| 1 | 2.959287000  | -1.778870000 | 0.205896000  |
| 6 | -0.106320000 | 0.768562000  | -0.337969000 |
| 1 | 0.761780000  | 0.926330000  | -0.987678000 |
| 1 | -0.976357000 | 1.095213000  | -0.921036000 |
| 6 | 0.026204000  | 1.651858000  | 0.904700000  |
| 1 | 0.922128000  | 1.409808000  | 1.485595000  |
| 1 | -0.839101000 | 1.550086000  | 1.567653000  |
| 1 | 0.098646000  | 2.704856000  | 0.614020000  |



|    |              |              |              |
|----|--------------|--------------|--------------|
| 7  | -0.032561000 | -0.225083000 | -0.082345000 |
| 6  | -1.224661000 | -0.963417000 | 0.431610000  |
| 1  | -0.945393000 | -1.466976000 | 1.363628000  |
| 1  | -1.983128000 | -0.218743000 | 0.688555000  |
| 6  | -1.796245000 | -1.940823000 | -0.582196000 |
| 1  | -1.092885000 | -2.739265000 | -0.825637000 |
| 1  | -2.043709000 | -1.432545000 | -1.517097000 |
| 1  | -2.702979000 | -2.393358000 | -0.170195000 |
| 6  | 1.266592000  | -0.742259000 | 0.418052000  |
| 1  | 2.031921000  | -0.093245000 | -0.018080000 |
| 1  | 1.295937000  | -0.627523000 | 1.507307000  |
| 6  | 1.526544000  | -2.179008000 | 0.006711000  |
| 1  | 1.451939000  | -2.279861000 | -1.079696000 |
| 1  | 0.835525000  | -2.878942000 | 0.484988000  |
| 1  | 2.538726000  | -2.457427000 | 0.312384000  |
| 6  | -0.148916000 | 1.249839000  | 0.069241000  |
| 1  | 0.663958000  | 1.676729000  | -0.525369000 |
| 1  | -1.077618000 | 1.528709000  | -0.436946000 |
| 6  | -0.125721000 | 1.758261000  | 1.498533000  |
| 1  | 0.832697000  | 1.573425000  | 1.991029000  |
| 1  | -0.917846000 | 1.314195000  | 2.109469000  |
| 1  | -0.284927000 | 2.839971000  | 1.493088000  |
| 1  | 0.037586000  | -0.336586000 | -1.226547000 |
| 17 | 0.318654000  | -0.295707000 | -2.908392000 |
